# Supplementary material for: Next-gen wearable energy harvester using PVDF-doped CuO composite nanofiber-based piezoelectric nanogenerators
Source: Research Square preprint supplement (doi:10.21203/rs.3.rs-7423207/v1), 2025-09-08
Supplement: Supplementary file 1 [file 768452065f72cb69ca0b59b3.docx]

**Supporting Information**

Next-gen wearable energy harvester using PVDF-doped CuO composite nanofiber-based piezoelectric nanogenerators

Bindhu Amrutha 1,†, Ponnan Sathiyanathan 2, †, Mohammad Shamim Reza 3, Hongdoo Kim 3, Arun Anand Prabu 1,*

1 Department of Chemistry, School of Advanced Sciences, Vellore Institute of Technology, Vellore 632014, Tamil Nadu, India

2 Vel Tech Rangarajan Dr.Sagunthala R&D Institute of Science & Technology, Chennai, 600062, Tamil Nadu, India

3 Department of Materials Science and Engineering, College of Engineering, Kyung Hee University, Yongin-si, Gyeonggi-do – 17104, Republic of Korea

† These authors contributed equally to this work.

***** Corresponding author E-mail: anandprabu@vit.ac.in


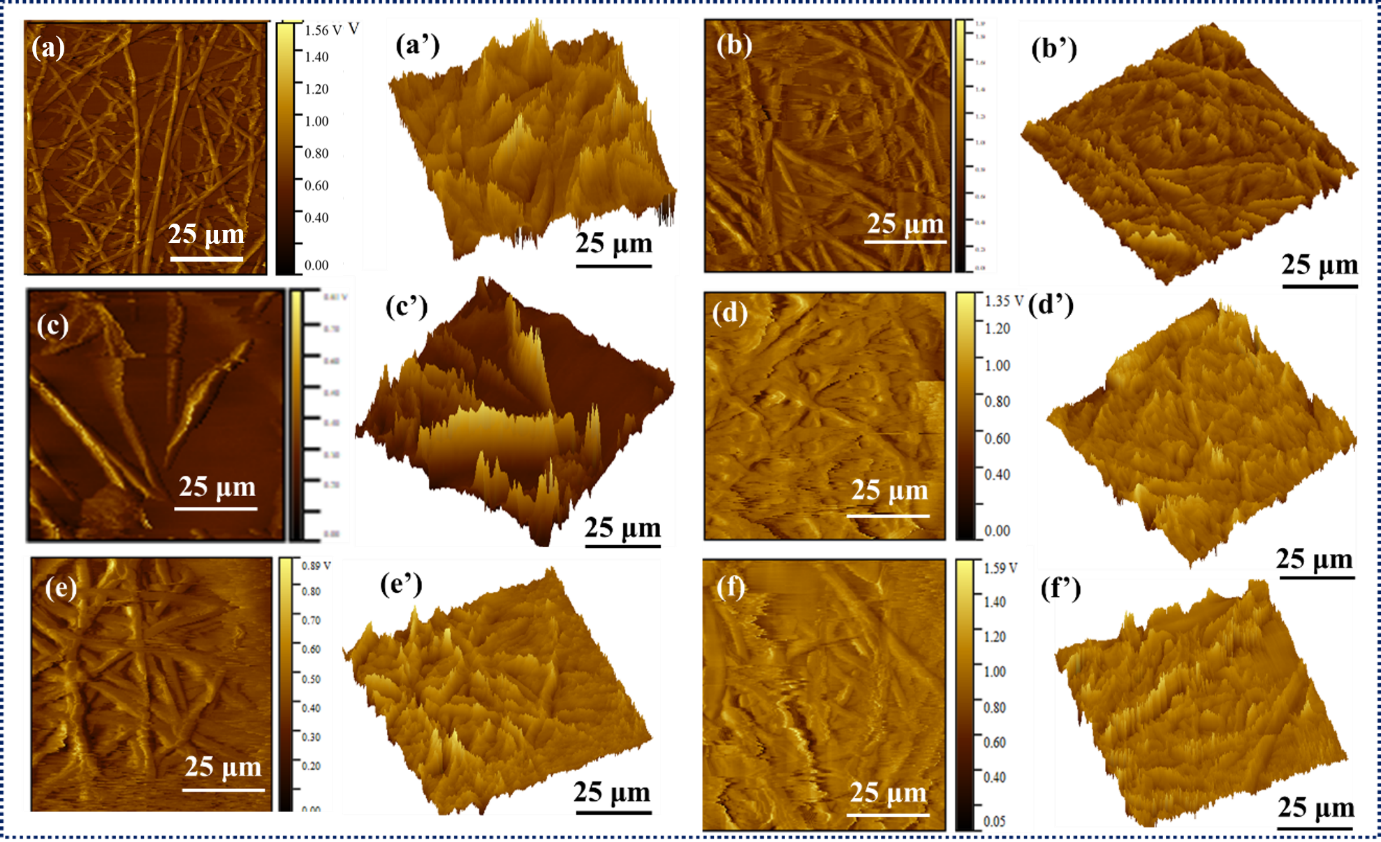


**Fig. S1** **a- f** High-resolution 2-D AFM images of 0PCu, 1PCu, 3PCu, 5PCu, and 7PCu NFs. **a’-f’** 3-D AFM images of corresponding NFs

**Table S1:** Fiber diameter distribution of neat and composite PVDF NFs.

| **Sample code** | **Distribution of the fiber diameter (nm)** | | | |
| --- | --- | --- | --- | --- |
| Mean | **Standard deviation** | **Min** | **Max** |
| 0PCu | 365 | 105 | 179 | 689 |
| 1PCu | 310 | 86 | 144 | 666 |
| 3PCu | 300 | 80 | 184 | 540 |
| 5PCu | 289 | 72 | 162 | 454 |
| 7PCu | 210 | 48 | 139 | 386 |

**Table S2**: *β*-phase content of neat and composite PVDF NFs.

| **Sample code** | **Absorption Intensity** | | **F(*β*)%** |
| --- | --- | --- | --- |
| **A*α*** | **A*β*** |
| 0PCu | 0.0311 | 0.1545 | 79 |
| 1PCu | 0.0430 | 0.239 | 81 |
| 3PCu | 0.0291 | 0.1785 | 83 |
| 5PCu | 0.0261 | 0.2111 | 86 |
| 7PCu | 0.0193 | 0.1279 | 84 |

**Table S3:** Surface morphology (AFM) study of neat and composite PVDF NFs.

| **Sample code** | **Ra (nm)** | **Rq (nm)** |
| --- | --- | --- |
| 0PCu | 170.0 | 215.7 |
| 1PCu | 431.0 | 542.0 |
| 3PCu | 510.0 | 638.0 |
| 5PCu | 1161.0 | 1499.0 |
| 7PCu | 568.0 | 768.0 |
